# Supplementary material for: Epigenetic mechanisms mediate cytochrome P450 1A1 expression and lung endothelial injury caused by MRSA in vitro and in vivo
Source: PubMed Central journal article supplement — FASEB J. 2024 Nov 26;38(22):e70205. doi: 10.1096/fj.202401812R (PMC11590412; doi:10.1096/fj.202401812r), 2024-11-26
Supplement: FSB2-38-e70205-s001.pdf [file FSB2-38-e70205-s001.pdf]

**Supplementary Table 1. Antibody List.**

| <b>Antibody</b>      | <b>Company and Catalog number</b>  | <b>Dilution</b> |
|----------------------|------------------------------------|-----------------|
| Anti-CYP1A1          | Proteintech (13241-1-AP)           | 1:1000          |
| Anti-VCAM-1          | Santa Cruz Biotechnology (sc-8304) | 1:1000          |
| Anti-ICAM-1          | ABclonal (A5592)                   | 1:5000          |
| Anti-Angiopoietin 2  | ABclonal (A0698)                   | 1:1000          |
| Anti- $\beta$ -Actin | Proteintech (HRP-60008)            | 1:10000         |
