# Supplementary material for: Epigenetic mechanisms mediate cytochrome P450 1A1 expression and lung endothelial injury caused by MRSA in vitro and in vivo
Source: PubMed Central journal article supplement — FASEB J. 2024 Nov 26;38(22):e70205. doi: 10.1096/fj.202401812R (PMC11590412; doi:10.1096/fj.202401812r), 2024-11-26
Supplement: FSB2-38-e70205-s004.pdf [file FSB2-38-e70205-s004.pdf]

**Supplementary Table 2. Top 20 highly ranked gene peaks**

| Gene Symbol | log2FC | FDR      |
|-------------|--------|----------|
| CYP1A1      | 2.40   | 6.37E-11 |
| VIPR1       | 3.92   | 9.77E-10 |
| CCDC28A     | 1.60   | 5.91E-06 |
| TONSL       | -3.14  | 7.57E-05 |
| MYL12AP1    | 1.49   | 1.23E-04 |
| SLC44A1     | 2.06   | 1.56E-04 |
| ACP7        | -7.46  | 5.64E-04 |
| KATNBL1P2   | 1.64   | 7.48E-04 |
| HNRNPA1P62  | 1.70   | 8.38E-04 |
| ADRB2       | 7.47   | 8.48E-04 |
| CUX1        | -7.27  | 1.26E-03 |
| IL17RE      | -7.27  | 1.26E-03 |
| PARD3       | -7.27  | 1.26E-03 |
| AKR7A3      | -7.34  | 1.26E-03 |
| F2RL3       | 1.56   | 1.36E-03 |
| SNN         | -7.20  | 1.89E-03 |
| ADGRF1      | 2.66   | 2.57E-03 |
| ZFYVE27     | -7.13  | 2.97E-03 |
| CPNE7       | 1.69   | 3.94E-03 |
| FAM49A      | -1.94  | 4.45E-03 |
