# Supplementary material for: Epigenetic mechanisms mediate cytochrome P450 1A1 expression and lung endothelial injury caused by MRSA in vitro and in vivo
Source: PubMed Central journal article supplement — FASEB J. 2024 Nov 26;38(22):e70205. doi: 10.1096/fj.202401812R (PMC11590412; doi:10.1096/fj.202401812r), 2024-11-26
Supplement: FSB2-38-e70205-s005.pdf [file FSB2-38-e70205-s005.pdf]

Blots in fig 1D

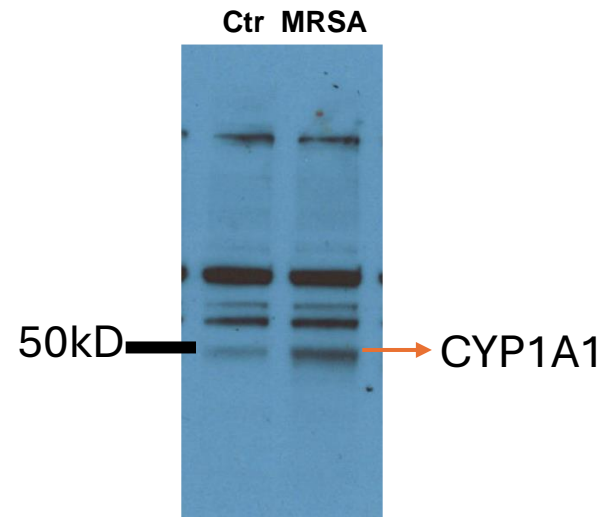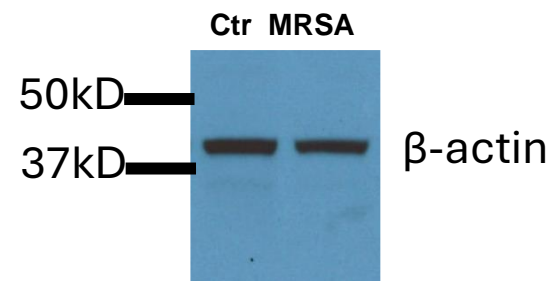

Blots in fig 2A

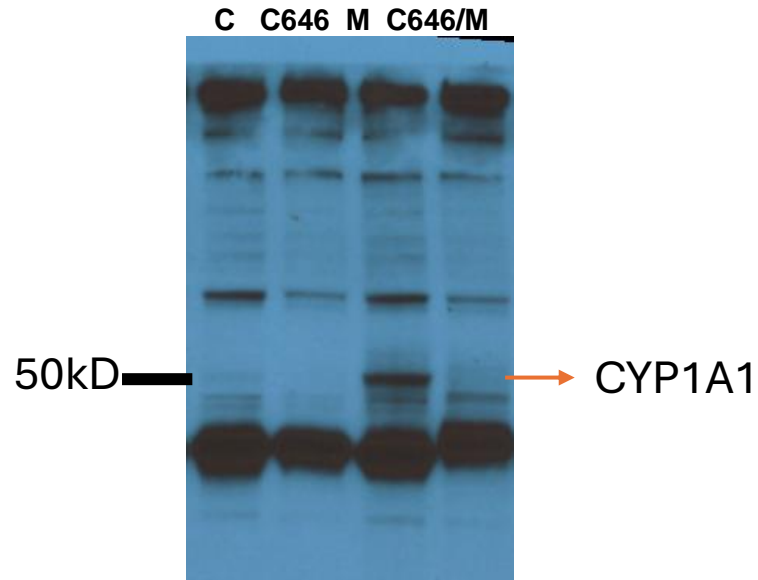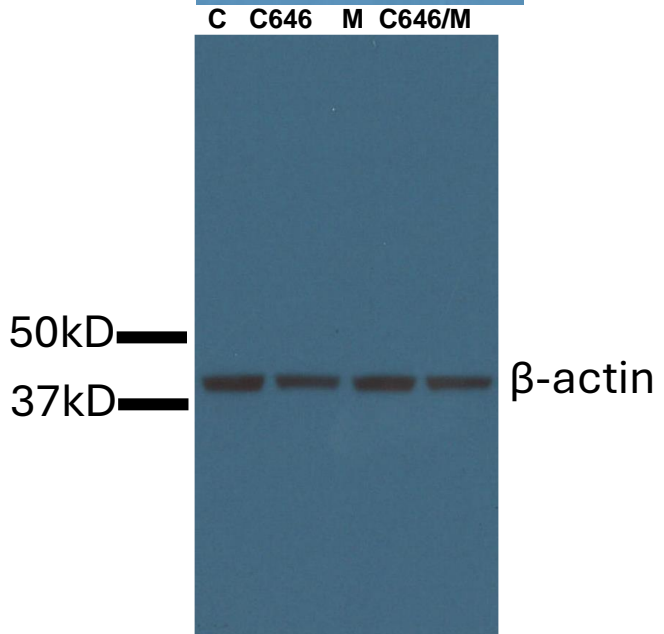

Blots in fig 2B

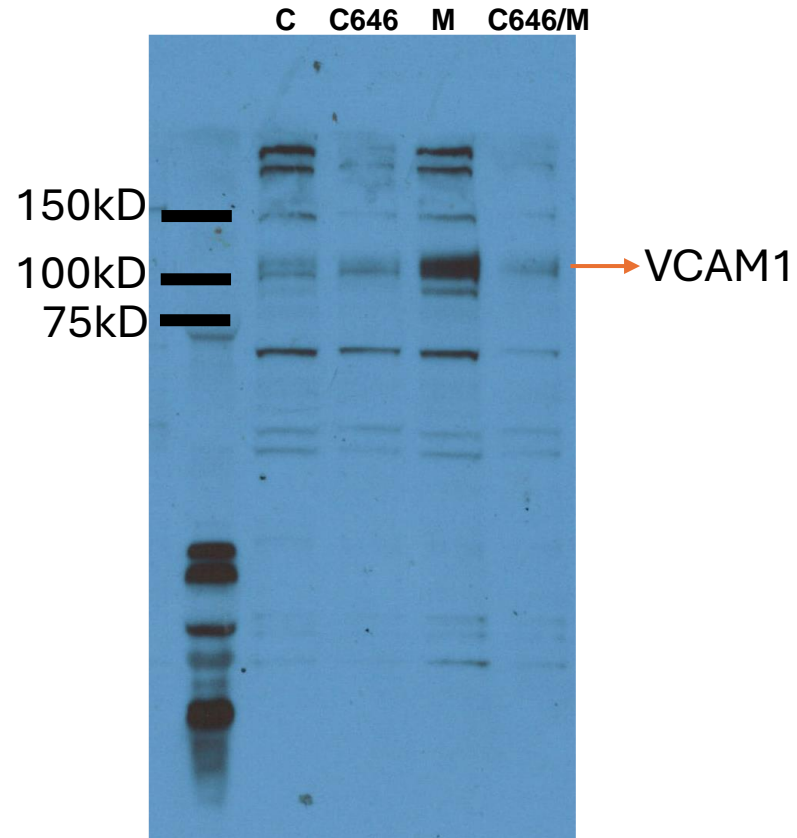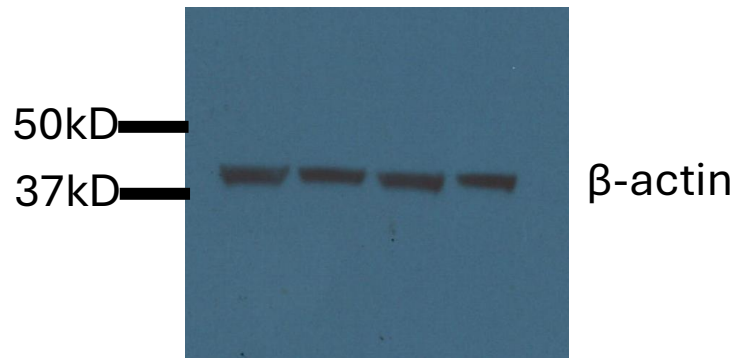

Blots in fig 2C

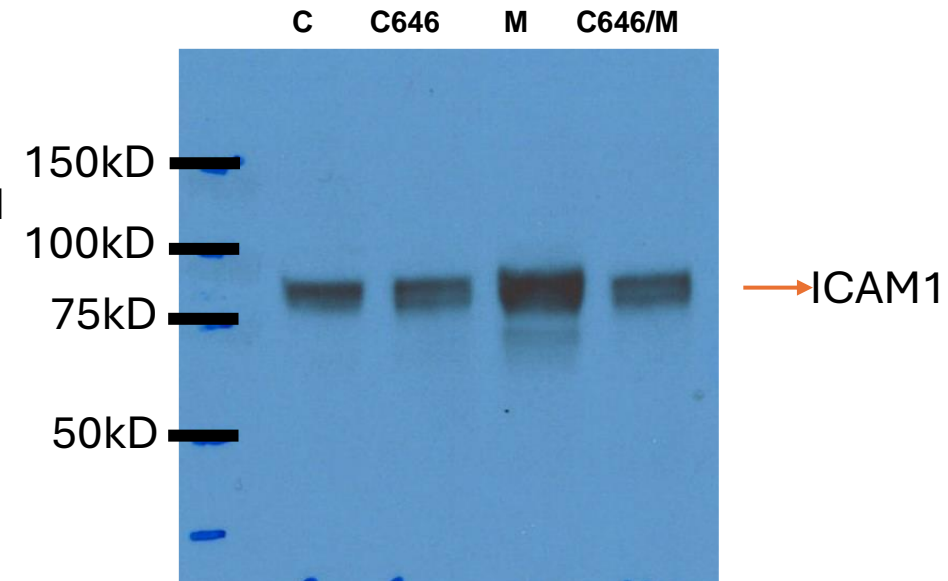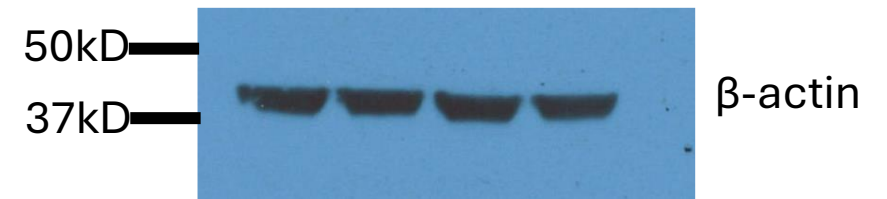

Supplementary Figure 3

Blots in fig 3A

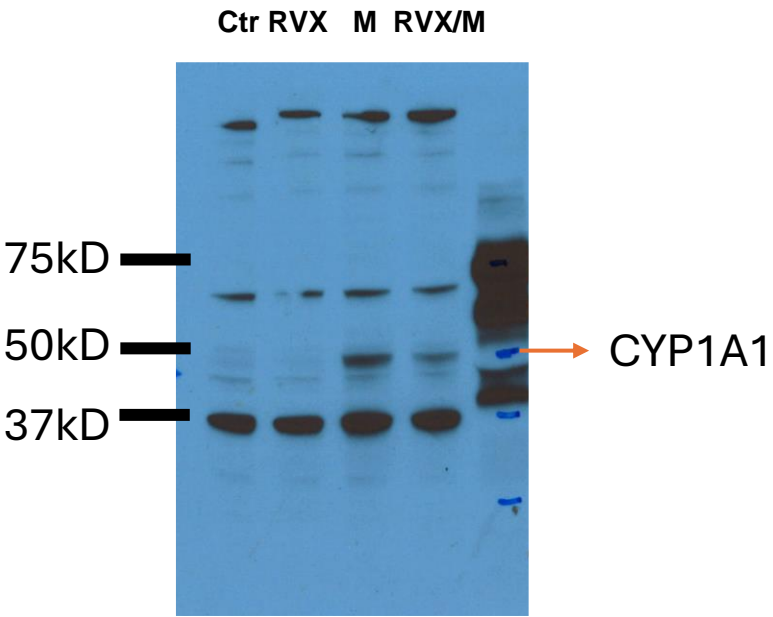

Blots in fig 3B

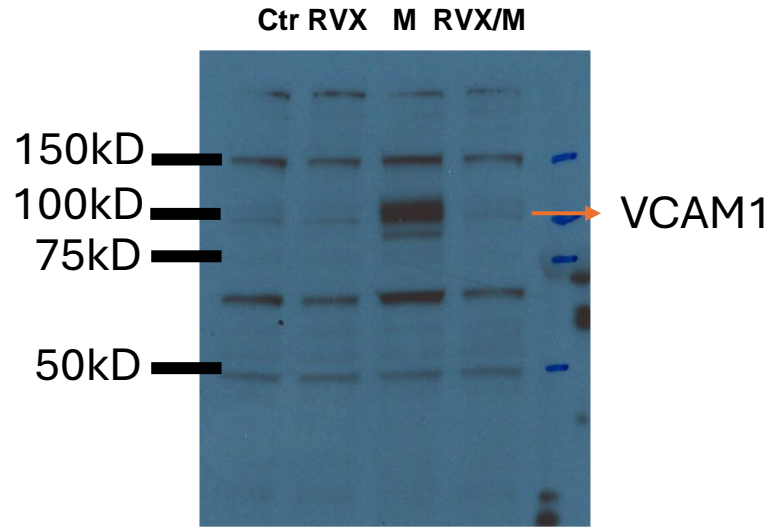

Blots in fig 3C

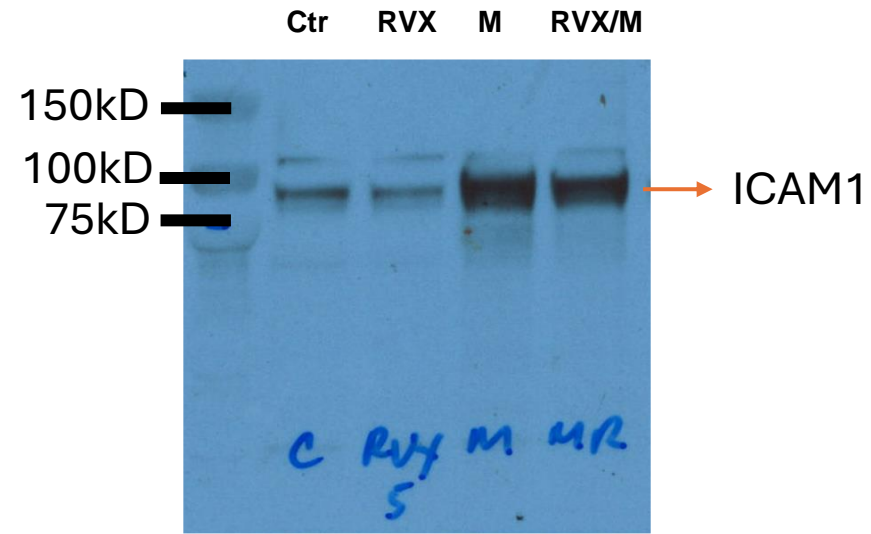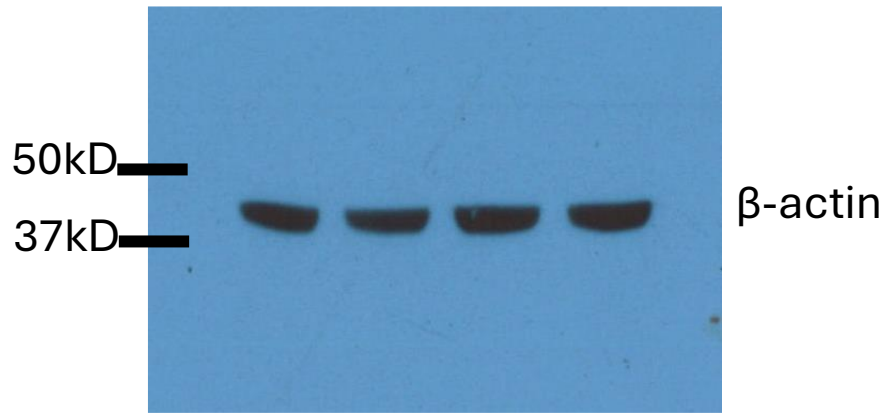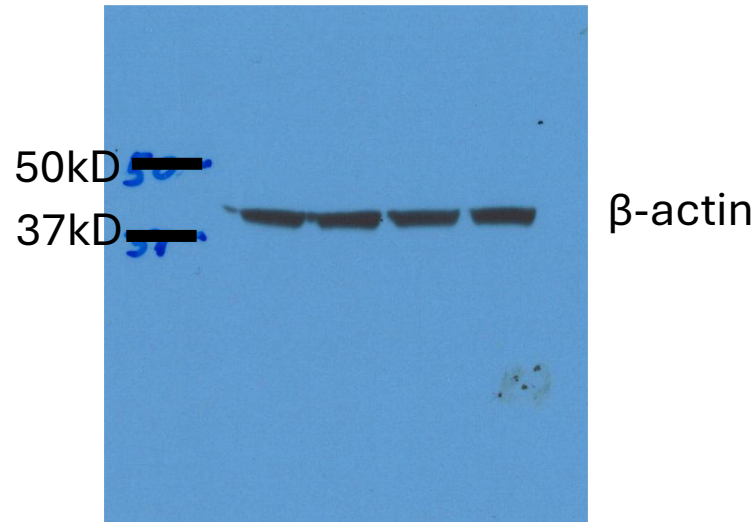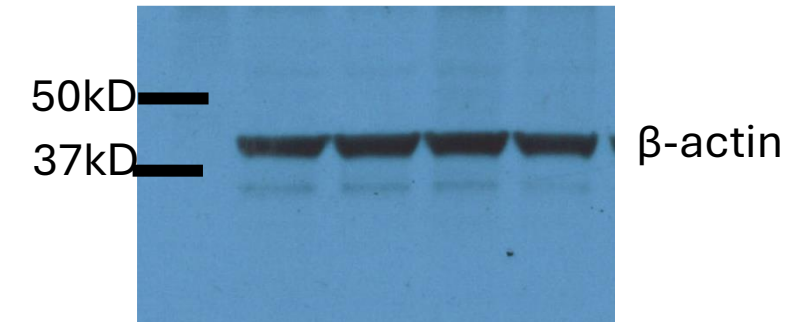

Supplementary Figure 3

Blots in fig 4B

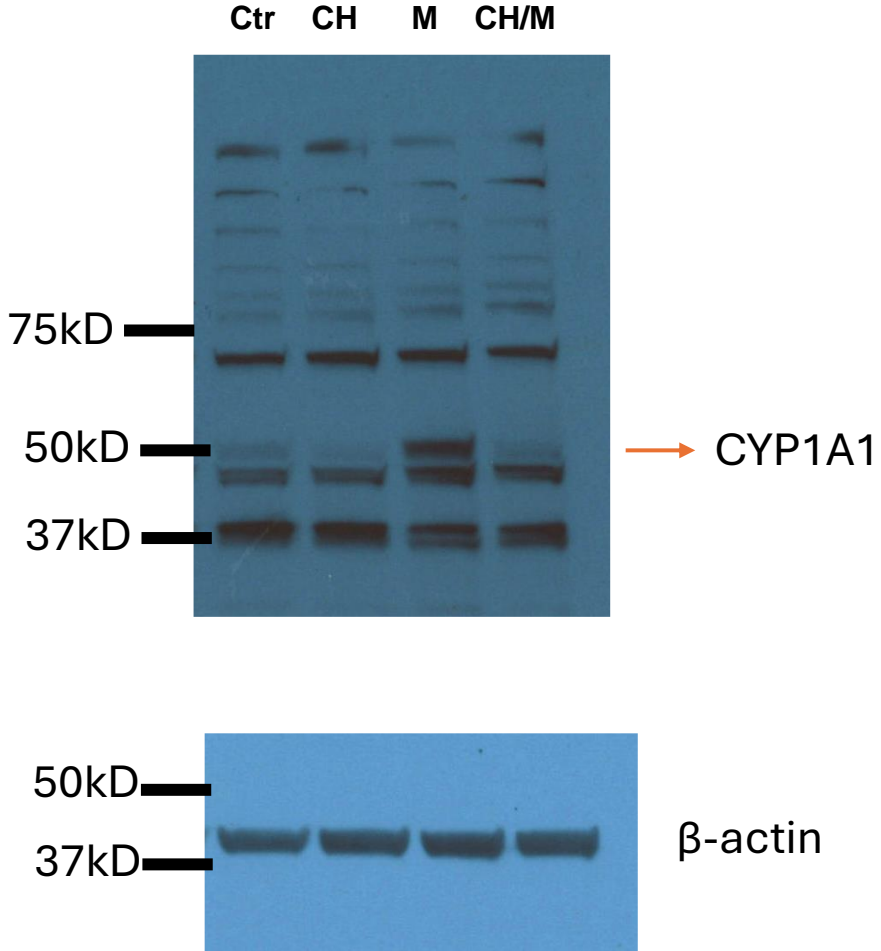

Supplementary Figure 3

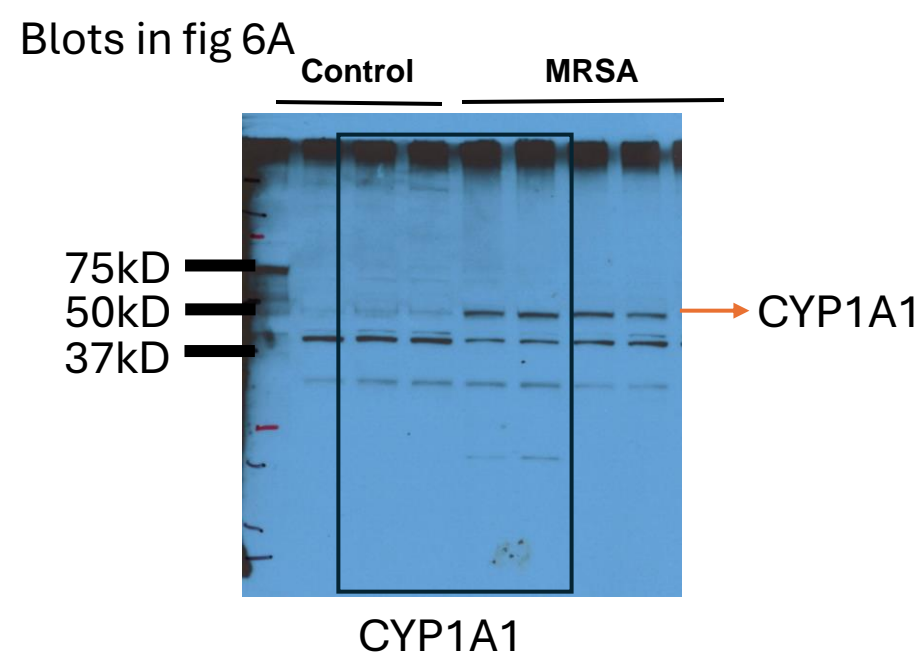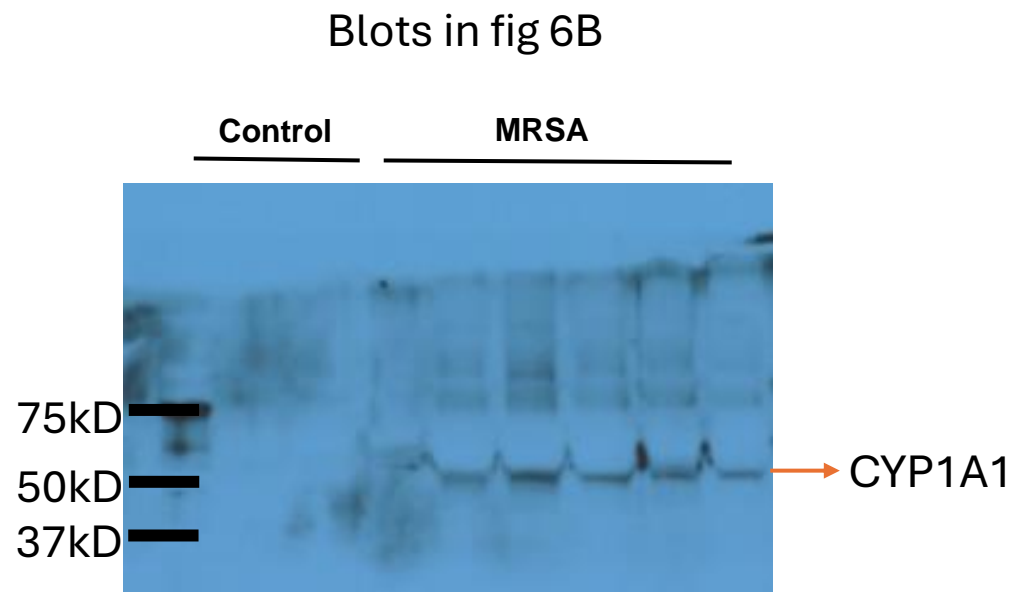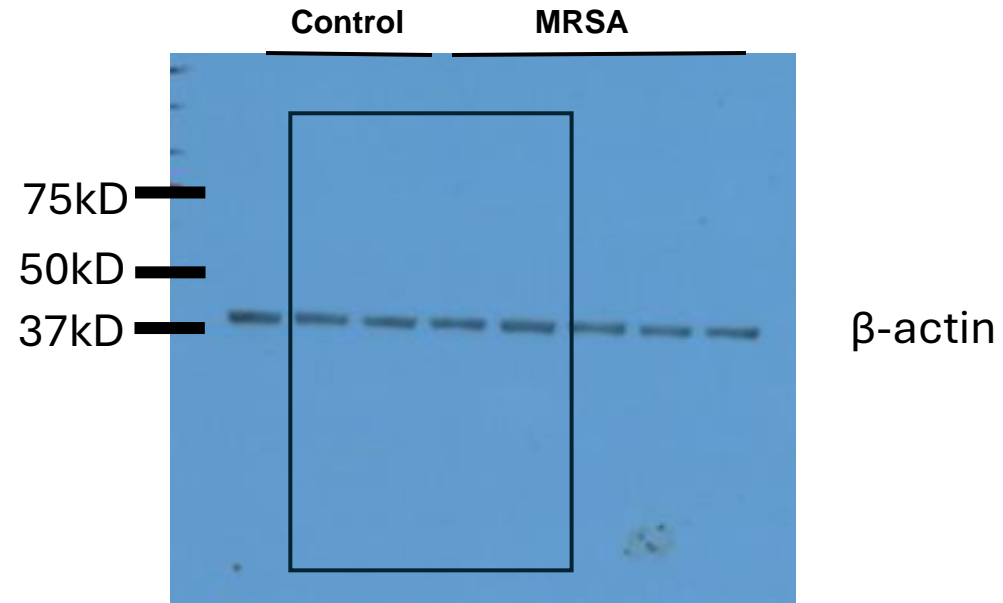

Supplementary Figure 3
