# Supplementary figures and images for: Epigenetic mechanisms mediate cytochrome P450 1A1 expression and lung endothelial injury caused by MRSA in vitro and in vivo
Source: PubMed Central journal article supplement — FASEB J. 2024 Nov 26;38(22):e70205. doi: 10.1096/fj.202401812R (PMC11590412; doi:10.1096/fj.202401812r), 2024-11-26

**A**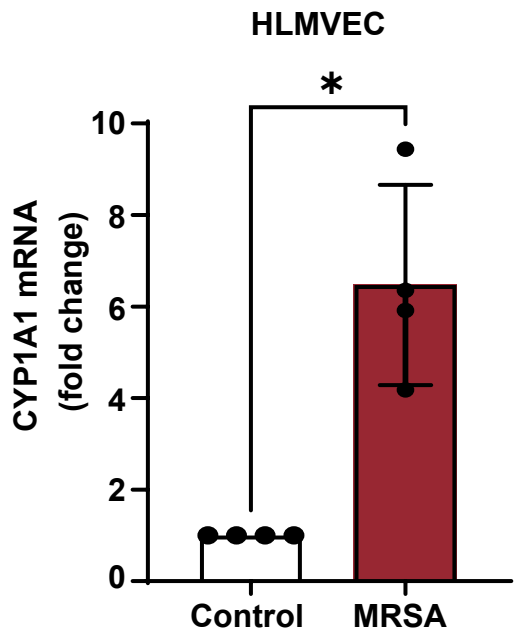**B**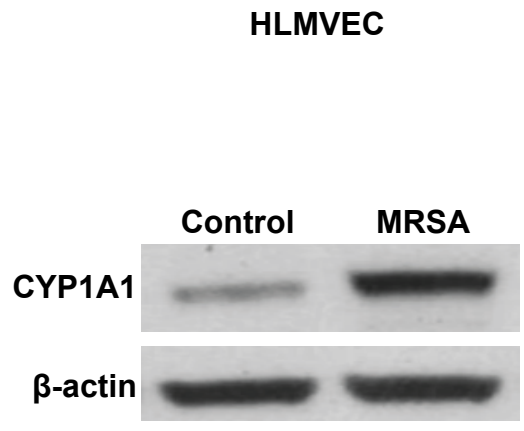

**Supplementary Figure 2**

Supplement: FSB2-38-e70205-s002.pdf [file FSB2-38-e70205-s002.pdf]

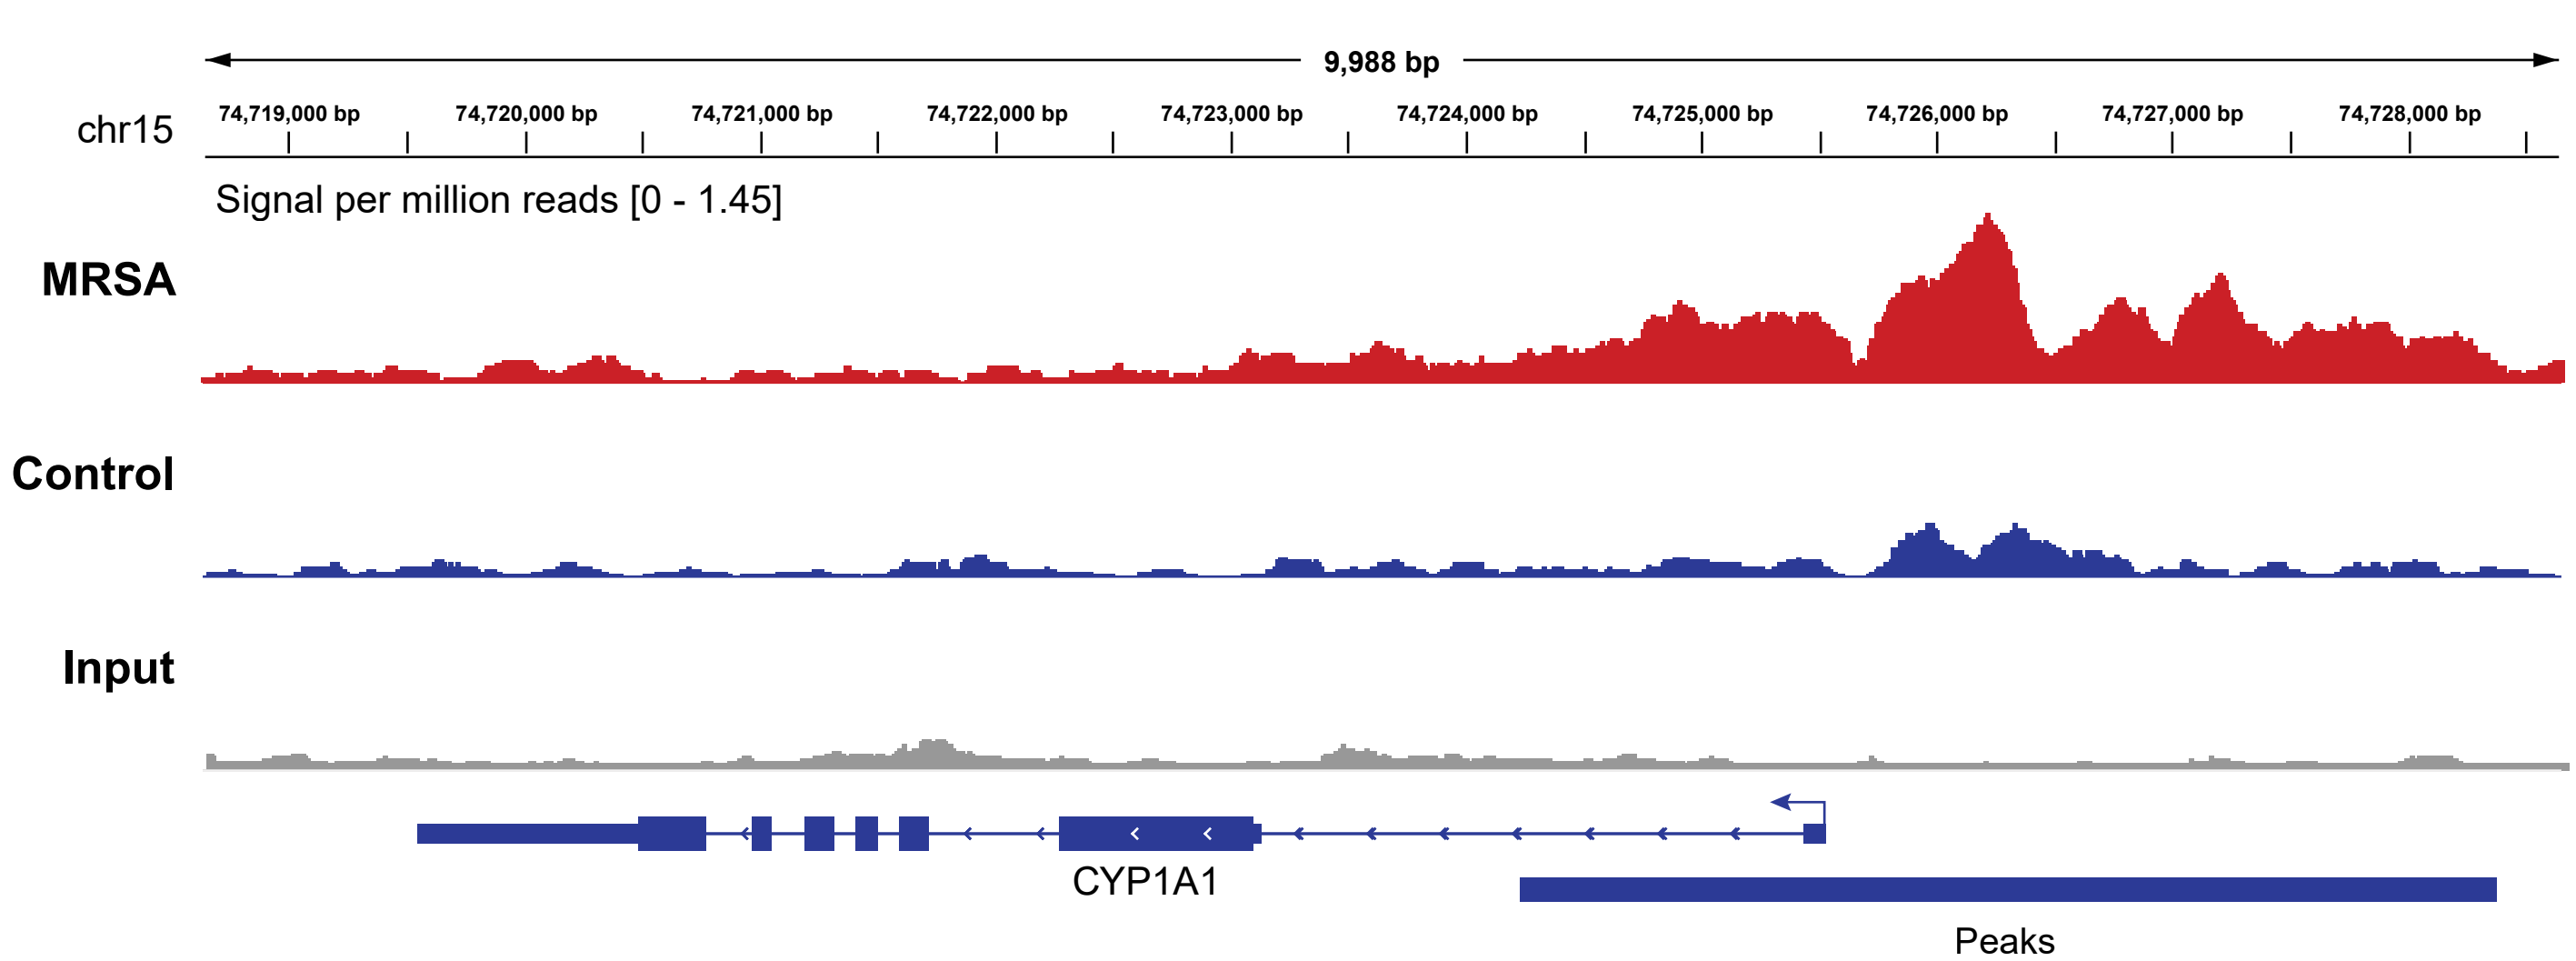

Supplement: FSB2-38-e70205-s003.pdf [file FSB2-38-e70205-s003.pdf]
